# Supplementary material for: Molecular orientation and stability of poly(3-hexylthiophene) nanogratings affected by the fabricated solvent vapor
Source: Royal Society of Chemistry journal article supplement (doi:10.1039/c9ra05693a), 2019-01-01
Supplement: c9ra05693a1.pdf [file c9ra05693a1.pdf]

## Electronic Supplementary Information (ESI) for RSC Advances

### Molecular orientation and its stability of poly(3-hexylthiophene) nanogratings affected by the fabricated solvent vapor

*Menxiang Qian<sup>a,b</sup>, Zhanhua Song<sup>a,b</sup>, Guangzhu Ding<sup>a,b,\*</sup>, Zhijun Hu<sup>c</sup> and Jieping Liu<sup>a,b</sup>*

<sup>a</sup>College of Chemistry and Materials Science, Huaibei Normal University, Huaibei 235000,  
China

<sup>b</sup>Anhui Key Laboratory of Energetic Materials, Anhui, 235000, China

<sup>c</sup>Center for Soft Condensed Matter Physics and Interdisciplinary Research, Soochow University,  
Suzhou, 215123, China

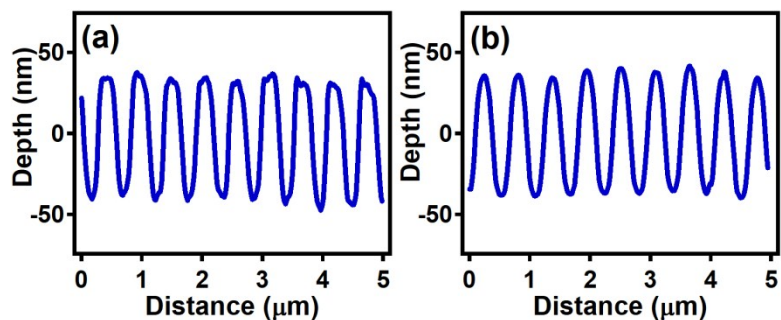

**Figure S1.** The cross-sectional profiles of AFM height images for PDMS template (a) and the fabricated P3HT nanograting film (b).

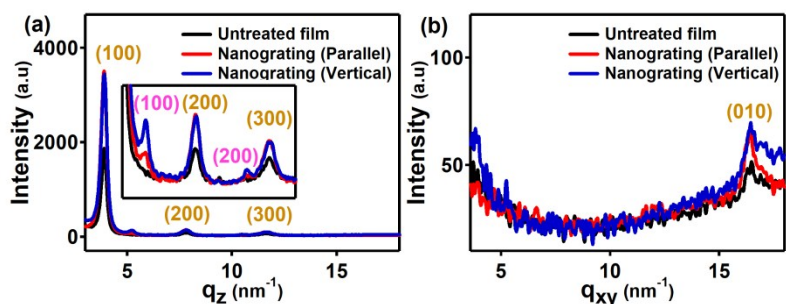

**Figure S2.** The one dimensional (1D) GIWAXD intensity images of untreated film and nanograting film integrated along the  $q_z$  direction (a) and the  $q_{xy}$  direction (b). The corresponding data are integrated from the 2D images indicated in Figure 4.

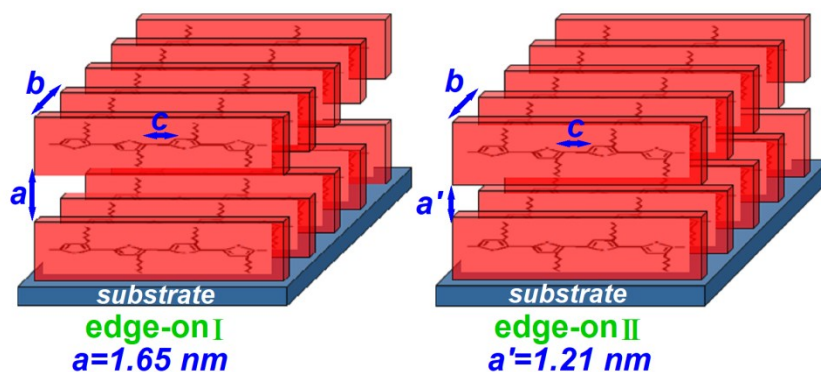

**Figure S3.** Schematic indication of edge-on molecular orientation for P3HT molecule chains.

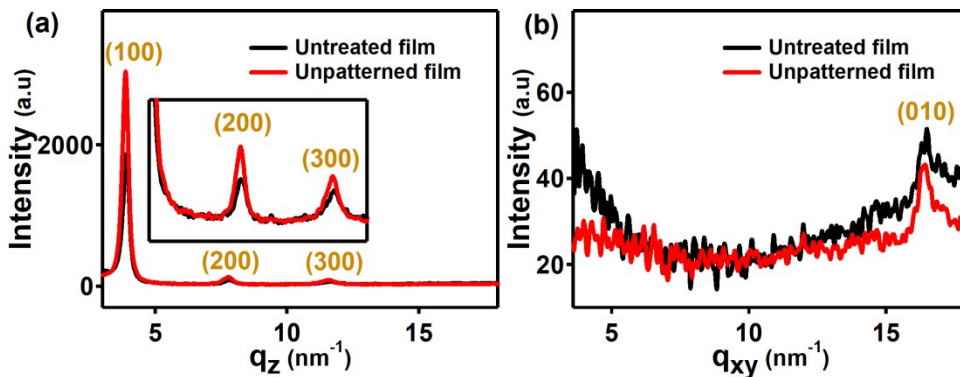

**Figure S4.** 1D GIWAXD intensity profiles of untreated and unpatterned film for the  $q_z$  direction (a) and  $q_{xy}$  direction (b). The unpatterned film is obtained by the same conditions as the fabrication of nanograting film with an unpatterned PDMS film rather than patterned PDMS template.

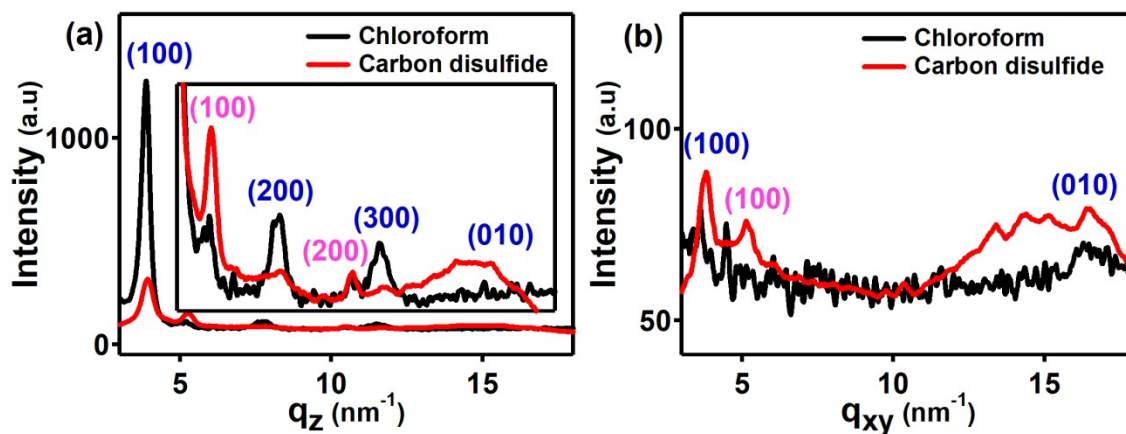

**Figure S5.** 1D GIWAXD intensity profiles of P3HT nanograting film by SV-NIL process with chloroform solvent and carbon disulfide solvent for the  $q_z$  direction (a) and  $q_{xy}$  direction (b). The integrated data are collected from the corresponding 2D images as shown in Fig. 6.

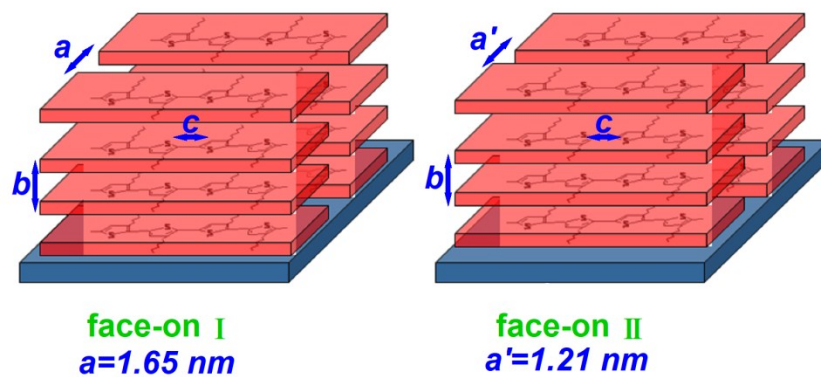

**Figure S6.** Schematic indication of face-on molecular orientation for P3HT molecule chains.

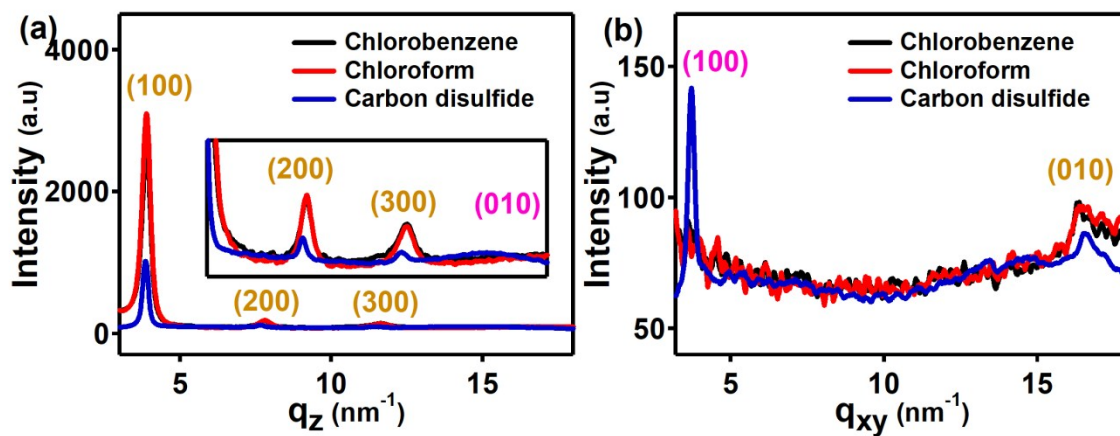

**Figure S7.** The 1D GIWAXD intensity curves of P3HT nanograting films after thermal annealing treatment integrated along the  $q_z$  direction (a) and the  $q_{xy}$  direction (b). The integrated data are collected from the corresponding 2D images as shown in Figure 7.

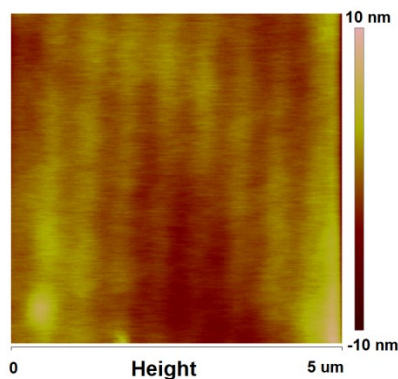

**Figure S8.** AFM height image of the annealed P3HT nanograting film.
